# Supplementary material for: Contribution of rare whole-genome sequencing variants to plasma protein levels and the missing heritability
Source: PubMed Central journal article supplement (PMC9085767; doi:10.1038/s41467-022-30208-8), 2022-05-09
Supplement: 41467_2022_30208_MOESM2_ESM.pdf [file 41467_2022_30208_MOESM2_ESM.pdf]

### **Description of Additional Supplementary Files**

File Name: Supplementary Data 1

Description: Information on the proteins analysed

File Name: Supplementary Data 2

Description: Lead GWAS hits from the primary and conditional analyses

File Name: Supplementary Data 3

Description: SKAT results for Cis-associations

File Name: Supplementary Data 4

Description: Multivariable regression for the final model after backward stepwise regression.

File Name: Supplementary Data 5

Description: SKAT results for Trans-associations

File Name: Supplementary Data 6

Description: SKAT results for biomarkers in UK Biobank
